# Supplementary material for: Cardiorespiratory function, resting metabolic rate and heart rate variability in coal miners exposed to hypobaric hypoxia in highland workplace
Source: PeerJ. 2022 Aug 30;10:e13899. doi: 10.7717/peerj.13899 (PMC9438770; doi:10.7717/peerj.13899)
Supplement: Data S1 [file peerj-10-13899-s001.xlsx]

## Sheet: Raw data
NAME	VO2	VCO2	HR	RMR	BF	VT	HEIGHT	AGE	WEIGHT	GROUP	BMI	TEMPERATURE	HUMIDITY	PRESSURE	VE	ALTITUDE	VO2_PER_HR	VCO2_PER_HR	RMSSD_sleep	RMSSD_awake	SDNN	LF_PER_HF	LF	HF	VLF	RMR_PER_BSA	VT_PER_KG	VO2_PER_kg
H-1	0.25	0.2	77	1704	19	0.53	171	34	75	0	25.6489	23.8	35	631	10.07	H	3.24675	2.5974	41.37	26.64	112.01	443.55	1708.6	1317.03	191.41	902.801	7.06667	3.33333
H-2	0.32	0.27	78	2233	22	0.63	178	35	80	0	25.2493	20.2	40	627	13.86	H	4.10256	3.46154	16.63	15.07	105.18	674.16	1203.67	232.99	169.57	1122.75	7.875	4
H-3	0.26	0.23	85	1849	22	0.58	175	36	74	0	24.1633	22.3	55	626	12.76	H	3.05882	2.70588	31.55	21.01	152.18	2137.01	1891.71	664.52	257.69	974.885	7.83784	3.51351
H-4	0.29	0.27	90	2045	21	0.67	170	38	80	0	27.6817	20.4	35	631	14.07	H	3.22222	3	16.98	9.58	60.38	1089.04	553.99	124.8	137.48	1052.14	8.375	3.625
H-5	0.27	0.22	71	1871	20	0.55	170	33	70	0	24.2215	21.1	35	631	11	H	3.80282	3.09859	21.07	18.82	85.74	395.1	1038.96	419.77	189.53	1029.09	7.85714	3.85714
H-6	0.26	0.21	67	1777	22	0.48	175	31	65	0	21.2245	21.6	55	626	10.56	H	3.8806	3.13433	30.9	20.96	98.15	884.63	1028.93	520.68	174.58	999.685	7.38462	4
H-7	0.31	0.24	83	2146	19	0.6	172	33	67	0	22.6474	21	40	628	11.4	H	3.73494	2.89157	44.19	11.13	69.95	463.73	545.27	184.47	61.88	1199.44	8.95522	4.62687
H-8	0.27	0.23	81	1873	23	0.51	170	34	57	0	19.7232	21.6	35	630	11.73	H	3.33333	2.83951	41.6	32.68	143.91	270.79	956.57	875.08	138.38	1141.63	8.94737	4.73684
H-9	0.31	0.24	101	2100	23	0.54	178	31	80	0	25.2493	22.4	32	627	12.42	H	3.06931	2.37624	27.57	22.64	102.87	391.41	1213.67	639.98	163.23	1055.88	6.75	3.875
H-10	0.22	0.19	75	1565	16	0.58	150	36	42	0	18.6667	22.3	32	627	9.28	H	2.93333	2.53333	43.81	20.06	215.46	498.72	865.42	768.29	162.54	1183.03	13.8095	5.2381
H-11	0.28	0.24	68	1966	16	0.63	174	37	64	0	21.1389	23.2	32	628	10.08	H	4.11765	3.52941	59.29	37.98	125.48	294.51	2465.98	2264.36	334.93	1117.82	9.84375	4.375
H-12	0.31	0.26	76	2164	19	0.67	173	42	67	0	22.3863	22	32	628	12.73	H	4.07895	3.42105	18.86	13.24	116.36	2819.79	817.01	201.9	139.85	1206	10	4.62687
H-13	0.25	0.2	97	1733	18	0.54	162	35	55	0	20.9572	25.4	38	628	9.72	H	2.57732	2.06186	18.15	11.54	101.63	726.32	749.32	308.22	91.79	1101.57	9.81818	4.54545
H-14	0.3	0.24	85	2057	20	0.58	170	32	69	0	23.8754	24.7	71	629	11.6	H	3.52941	2.82353	29.17	18.48	122.54	879.41	2494.7	572.44	427.36	1139.56	8.4058	4.34783
H-15	0.25	0.21	84	1749	18	0.63	178	45	66	0	20.8307	24.2	71	629	11.34	H	2.97619	2.5	10.52	13.75	86.66	1517.27	627.78	299.6	75.63	968.187	9.54545	3.78788
H-16	0.28	0.23	79	1942	17	0.62	170	46	73	0	25.2595	23.3	38	628	10.54	H	3.5443	2.91139	23.47	10.53	118.55	417.15	456.27	211.11	87.32	1045.96	8.49315	3.83562
H-17	0.29	0.27	87	2033	19	0.62	168	38	60	0	21.2585	20.8	52	629	11.78	H	3.33333	3.10345	41.94	20.23	100.37	2400.04	1323.58	669.45	156.5	1214.95	10.3333	4.83333
H-18	0.22	0.19	76	1569	22	0.6	173	34	90	0	30.0712	21.1	41	629	13.2	H	2.89474	2.5	36.68	16.03	156.74	596.08	1114.38	550.98	188.14	754.449	6.66667	2.44444
H-19	0.26	0.21	84	1784	18	0.61	180	36	76	0	23.4568	20.7	40	627	10.98	H	3.09524	2.5	13.5	13.52	74.38	860.27	824.25	245.96	96.11	915.173	8.02632	3.42105
H-20	0.29	0.24	75	2036	20	0.54	172	32	67	0	22.6474	22.1	53	629	10.8	H	3.86667	3.2	29.54	24.39	116.13	599.49	1496.31	700.69	159.22	1137.96	8.0597	4.32836
H-21	0.38	0.32	82	2622	16	1	175	52	95.5	0	31.1837	23.6	52	630	16	H	4.63415	3.90244	15.97	19.54	87.28	389.7	1266.25	484.55	163.64	1216.92	10.4712	3.97906
H-22	0.34	0.27	78	2346	19	0.58	170	34	80	0	27.6817	20.9	53	628	11.02	H	4.35897	3.46154	31.17	18.17	93.11	533.99	714.78	315.63	101.51	1207.01	7.25	4.25
H-23	0.3	0.24	74	2040	18	0.67	168	45	78	0	27.6361	21.1	40	627	12.06	H	4.05405	3.24324	28.72	19.35	103.91	471.54	957.77	497.32	147.06	1069.25	8.58974	3.84615
L-1	0.34	0.31	69	2411	21	0.54	169	29	80	2	28.0102	22.5	67	1021	11.34	L	4.92754	4.49275	70.65	22.88	160.69	278.69	745.91	1989.85	105.5	1244.11	6.75	4.25
L-2	0.32	0.26	72	2205	10	0.79	171	30	82	2	28.0428	22.7	67	1021	7.9	L	4.44444	3.61111	105.8	68.88	271.61	386.3	2791.55	4473.33	349.59	1117.26	9.63415	3.90244
L-3	0.3	0.23	68	2043	15	0.52	170	35	75	2	25.9516	23.6	67	1021	7.8	L	4.41176	3.38235	63.43	48.73	140.43	167.93	1005.63	1461.49	141.13	1085.59	6.93333	4
L-4	0.4	0.35	67	2819	22	0.62	188	34	105	2	29.708	27.8	67	1022	13.64	L	5.97015	5.22388	68.01	26.72	137.79	429.49	1295.14	1023.6	156.42	1203.85	5.90476	3.80952
L-5	0.33	0.25	84	2240	22	0.42	167	45	77	2	27.6095	24	67	1022	9.24	L	3.92857	2.97619	24.78	16.3	93.05	334.49	983.8	533.57	122.08	1185.21	5.45455	4.28571
L-6	0.33	0.26	77	2290	20	0.49	182	30	80	2	24.1517	25.1	67	1022	9.8	L	4.28571	3.37662	33.65	25.63	143.04	176.03	888.89	826.14	121.43	1138.69	6.125	4.125
L-7	0.35	0.29	77	2452	14	0.74	165	43	85	2	31.2213	25.2	67	1022	10.36	L	4.54545	3.76623	13.88	11.54	104.74	482.6	613.7	187.69	87.91	1242.28	8.70588	4.11765
L-8	0.34	0.27	74	2318	13	0.65	175	31	103	2	33.6327	26.9	67	1022	8.45	L	4.59459	3.64865	40.3	16.51	115.21	535.15	856.95	568.9	123.58	1035.92	6.31068	3.30097
L-9	0.35	0.31	87	2457	24	0.52	177	34	80	2	25.5354	27.2	96	1022	12.48	L	4.02299	3.56322	33.13	15.5	142.66	872.78	766.69	663.08	92.91	1238.87	6.5	4.375
L-10	0.35	0.28	69	2387	19	0.5	170	52	80	2	27.6817	26.8	96	1023	9.5	L	5.07246	4.05797	35.59	20.07	156.11	393.51	1609.06	648.14	208.03	1228.1	6.25	4.375
L-11	0.25	0.2	58	1702	18	0.48	177	39	75	2	23.9395	26.6	53	1024	8.64	L	4.31034	3.44828	39.15	22.87	178.53	300.95	1373.3	772.72	173.52	886.326	6.4	3.33333
L-12	0.26	0.21	58	1821	15	0.48	168	32	57	2	20.1956	26.4	53	1024	7.2	L	4.48276	3.62069	47.02	29.76	164.09	308.95	1943.68	1502.12	212.28	1116.53	8.42105	4.5614
L-13	0.26	0.22	83	1805	13	0.47	170	33	64	2	22.1453	27	72	1025	6.11	L	3.13253	2.6506	24.16	7.99	102.66	311.46	419.62	386.91	52.65	1038.28	7.34375	4.0625
L-14	0.32	0.29	79	2233	13	0.58	175	32	95	2	31.0204	24.4	42	1025	7.54	L	4.05063	3.67089	36.13	15.42	123.32	310.64	1085.9	713.81	128.91	1039.1	6.10526	3.36842
L-15	0.3	0.27	94	2135	18	0.6	176	29	72.5	2	23.4052	24.6	56	1020	10.8	L	3.19149	2.87234	41.11	12.07	127.8	733.56	680.42	849.53	76.94	1134.03	8.27586	4.13793
L-16	0.37	0.3	87	2574	15	0.65	176	31	85	2	27.4406	28	56	1020	9.75	L	4.25287	3.44828	53.89	24.22	181.53	231.33	1433.04	1276.86	150.06	1262.68	7.64706	4.35294
L-17	0.34	0.25	92	2293	18	0.51	170	32	70	2	24.2215	26.8	56	1020	9.18	L	3.69565	2.71739	16.27	10.26	90.98	283.66	290.89	290.03	31.81	1261.19	7.28571	4.85714
L-18	0.32	0.27	57	2208	19	0.48	175	34	76	2	24.8163	26.4	56	1020	9.12	L	5.61404	4.73684	30.5	22.94	140.79	466.49	1735.72	635.46	208.68	1148.75	6.31579	4.21053
L-19	0.27	0.23	60	1881	13	0.53	172	34	76	2	25.6896	26.8	56	1021	6.89	L	4.5	3.83333	34.3	17.51	150.33	419.27	1162.55	639.78	132.1	987.118	6.97368	3.55263
L-20	0.29	0.24	58	2032	11	0.7	170	44	86	2	29.7578	26.5	56	1021	7.7	L	5	4.13793	34.49	24.92	132.73	241.3	954.26	678.47	124.74	1008.33	8.13953	3.37209
L-21	0.3	0.27	83	2102	13	0.57	173	48	80	2	26.7299	27	56	1021	7.41	L	3.61446	3.25301	15.29	9.96	83.91	283.82	336.25	229.01	46.2	1072.05	7.125	3.75
L-22	0.28	0.23	71	1943	9	0.64	178	28	75	2	23.6713	24.2	56	1021	5.76	L	3.94366	3.23944	32.58	25.37	169.59	220.87	1237.22	884.54	133.48	1008.98	8.53333	3.73333
